# Supplementary material for: Anaerobic Gram-Negative Bacteria: Role as a Reservoir of Antibiotic Resistance
Source: MDPI journal article supplement (doi:10.3390/antibiotics12050942), 2023-05-22
Supplement: s1 [file s1]

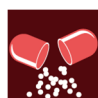

## Supplementary file

**Table S1:** Minimum inhibitory concentration breakpoints as per the CLSI guidelines

| Drugs                   | Sensitive (S) mg/L | Intermediate (I) mg/L | Resistant (R) mg/L |
|-------------------------|--------------------|-----------------------|--------------------|
| Metronidazole           | ≤ 8                | 16                    | ≥ 32               |
| Clindamycin             | ≤ 2                | 4                     | ≥ 8                |
| Imipenem                | ≤ 4                | 8                     | ≥ 16               |
| Piperacillin-tazobactam | ≤ 16/4             | 32/4-64/4             | ≥ 128/4            |
| Chloramphenicol         | ≤ 8                | 16                    | ≥ 32               |
| Cefoxitin               | ≤ 16               | 32                    | ≥ 64               |

**Table S2:** PCR primers and the thermal cycling parameters used to detect the target AMR genes and IS elements

| Gene                     | Primer sequence (5'–3')                                     | Size                                           | PCR conditions                                                                  | Ref.    |
|--------------------------|-------------------------------------------------------------|------------------------------------------------|---------------------------------------------------------------------------------|---------|
| <i>nim</i>               | F-ATGTTTCAGAGAAATGCGGCGTAAGCG<br>R-GCTTCCTTGCCTGTCATGTGCTC  | 458 bp                                         | 94°C for 5 min; 35 cycles of 94°C for 30 sec, 63°C for 55 sec, 72°C for 45 sec. | [3]     |
| <i>cfiA</i>              | F-ATG GTACCTTCCAACGGG<br>R-CACGATATTGTCTCGGTCGC             | 353 bp                                         | 94°C for 5 min; 35 cycles of 94°C for 1 min, 52°C for 1 min, 72°C for 1 min.    | [54]    |
| <i>IS1186</i>            | F-GAGAATCAAGCTTCTCGCC<br>R-CCCCGAATTCGCCTTTGCCCGTA          | 1-6 kb                                         | 94°C for 5 min; 35 cycles of 98°C for 10 sec, 60°C for 30 sec, 68°C for 1 min.  | [55,56] |
| <i>cfiA<sup>IS</sup></i> | G'-CGCCAAGCTTTGCCTGCCATTAT<br>E'-CTTCGAATTCGGCGAGGGATACATAA | <sup>a</sup> 1.6-1.7 kb<br><sup>b</sup> 350 bp | 95°C for 1 min; 35 cycles of 95°C for 20 sec, 64°C for 2 min, 72°C for 1 min.   | [57]    |
| <i>cepA</i>              | F: TTTCTGCTATGTCCTGCCC<br>R: ATCTTTCACGAAGACGGC             | 780 bp                                         | 98°C 10 s, 60°C 30s, 68°C 1 min, 30 cycles                                      | [3]     |
| <i>cfxA</i>              | F: ATCGTAGTTTTGAGTATAGCT<br>R: TAAAAGCACTCCGATAACGAT        | 1010 bp                                        | 94°C 1 min, 56.5°C 45 s, 72°C 2 min, 30x                                        | [3]     |
| <i>ermF</i>              | F: CGGGTCAGCACTTTACTATTG<br>R: GGACCTACCTCATAGACAAG         | 466 bp                                         | 94°C 30s, 50°C 30 s, 72°C 2 min, 35x                                            | [3]     |
| <i>cat</i>               | F: CCTGCCACTCATCGCAGT<br>R: CCACCGTTGATATATCCC              | 623 bp                                         | 94°C 30s, 54°C 30 s, 72°C 2 min, 35x                                            | [58]    |

F: forward, R: reverse. *cfiA<sup>IS</sup>*, *cfiA* gene (350 bp), and the intact segment containing *cfiA* gene and upstream insertion sequence elements (1.6-1.7 kb).

**Table S3 (A):** PCR reagents and reaction setup for *nim* gene and *cfiA* gene

| Reagents       | Volume for 25 µl |
|----------------|------------------|
| PCR buffer     | 0.5 µl           |
| dNTP           | 1.25 µl          |
| Forward primer | 0.5 µl           |
| Reverse primer | 0.5 µl           |
| Taq polymerase | 0.25 µl          |
| Template DNA   | 02 µl            |

|                   |       |
|-------------------|-------|
| MgCl <sub>2</sub> | 01 µl |
| dH <sub>2</sub> O | 19 µl |
| Total             | 25 µl |

**Table S3 (B):** PCR reagents and reaction setup with master mix for genes (*cfiA*, *ermF*, *cfxA*, *cepA*, *cat*), IS1186 and *cfiA*<sup>IS</sup>

| Reagents                                             | Volume for 20 µl |
|------------------------------------------------------|------------------|
| Master mix (Sigma REDTaq ReadyMix™ PCR Reaction Mix) | 10 µl            |
| Forward primer                                       | 0.4 µl           |
| Reverse primer                                       | 0.4 µl           |
| Template DNA                                         | 02 µl            |
| dH <sub>2</sub> O                                    | 7.2 µl           |
| Total                                                | 20 µl            |

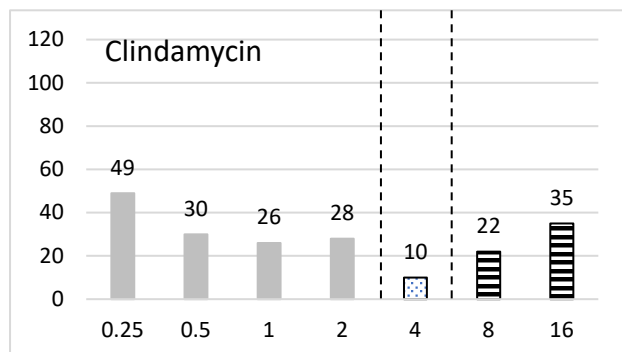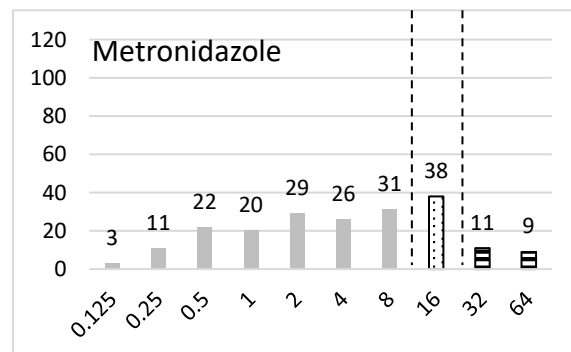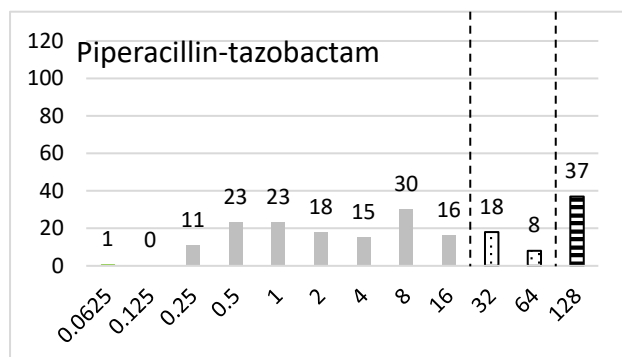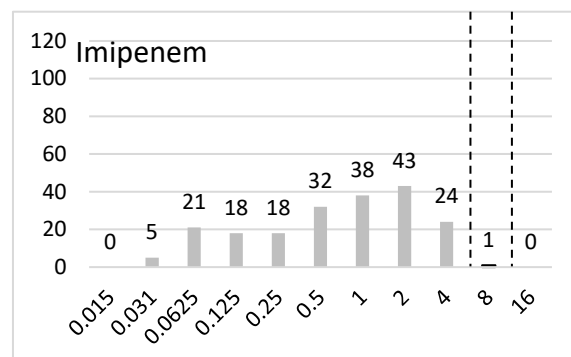

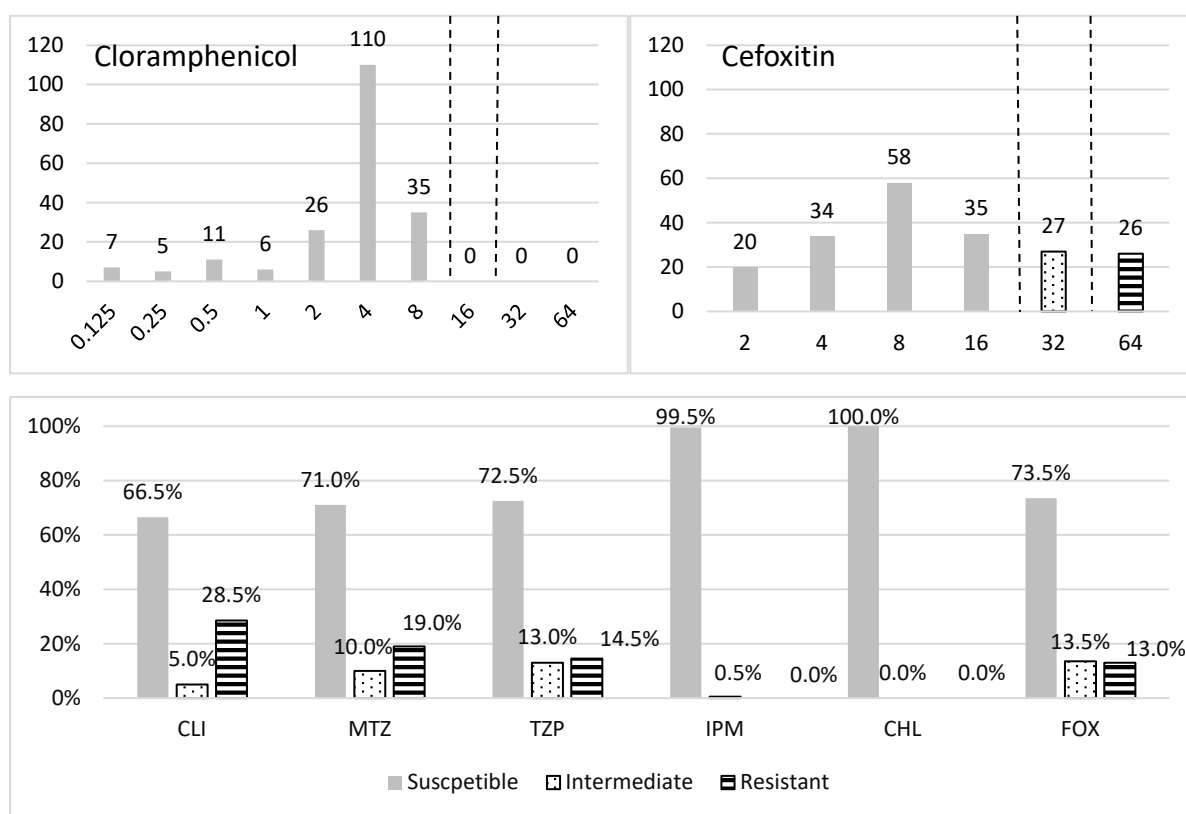

**Figure S1:** MIC distribution of anaerobic isolates and the overall resistance rate to six antimicrobials. Bars depict the numbers of resistant, intermediate, and susceptible isolates to clindamycin (CLI), metronidazole (MTZ), piperacillin/tazobactam (TZP), imipenem (IPM), chloramphenicol (CHL), cefoxitin (FOX) at different drug concentrations. The broken lines represent clinical breakpoints (mg/L) as per the CLSI guidelines. The x-axis shows drug concentration in (mg/L), and the y-axis shows the number of isolates.

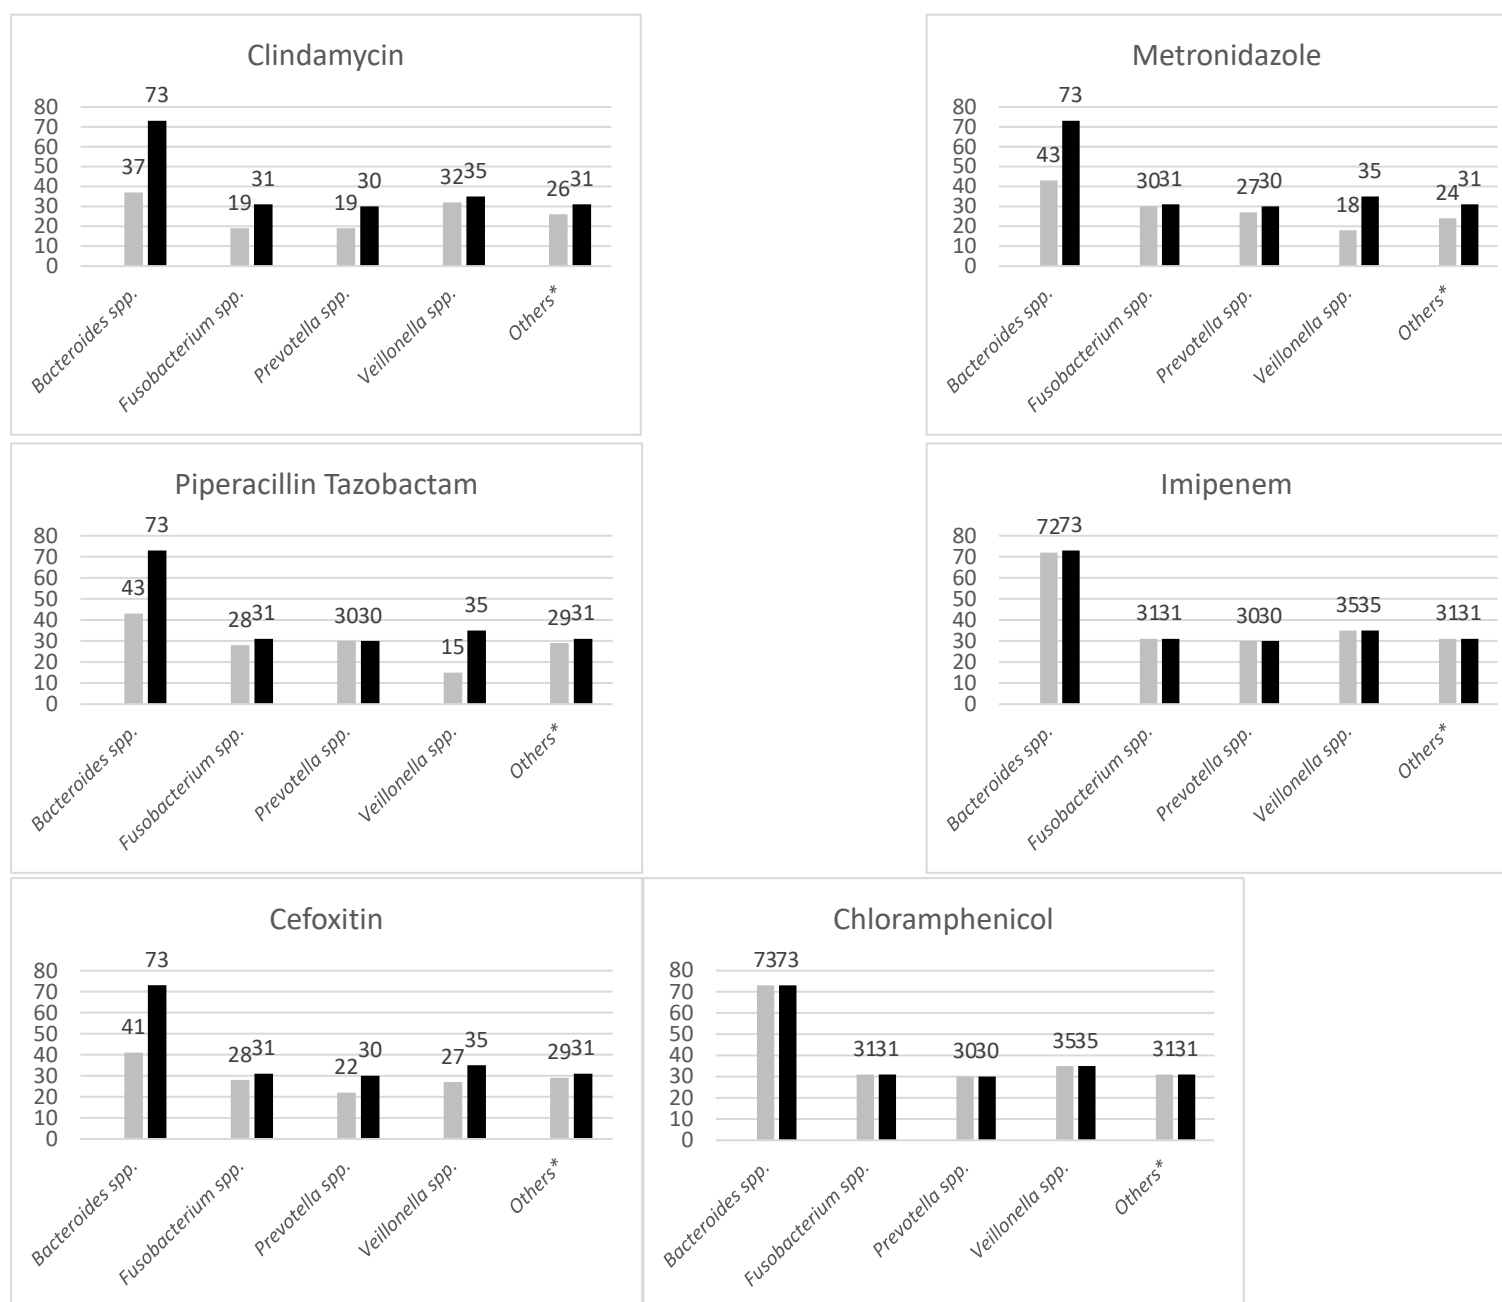

**Figure S2:** Antimicrobial susceptibility of clinical isolates representing different genera to tested antimicrobials. Others\* *Acidaminococcus* spp., *Alistipes* spp., *Anaerobiospirillum* spp., *Bilophila* spp., *Parabacteroides* spp., *Porphyromonas* spp., *Sutterella* spp. The black and grey bars represent total number of isolates and susceptible isolates, respectively.

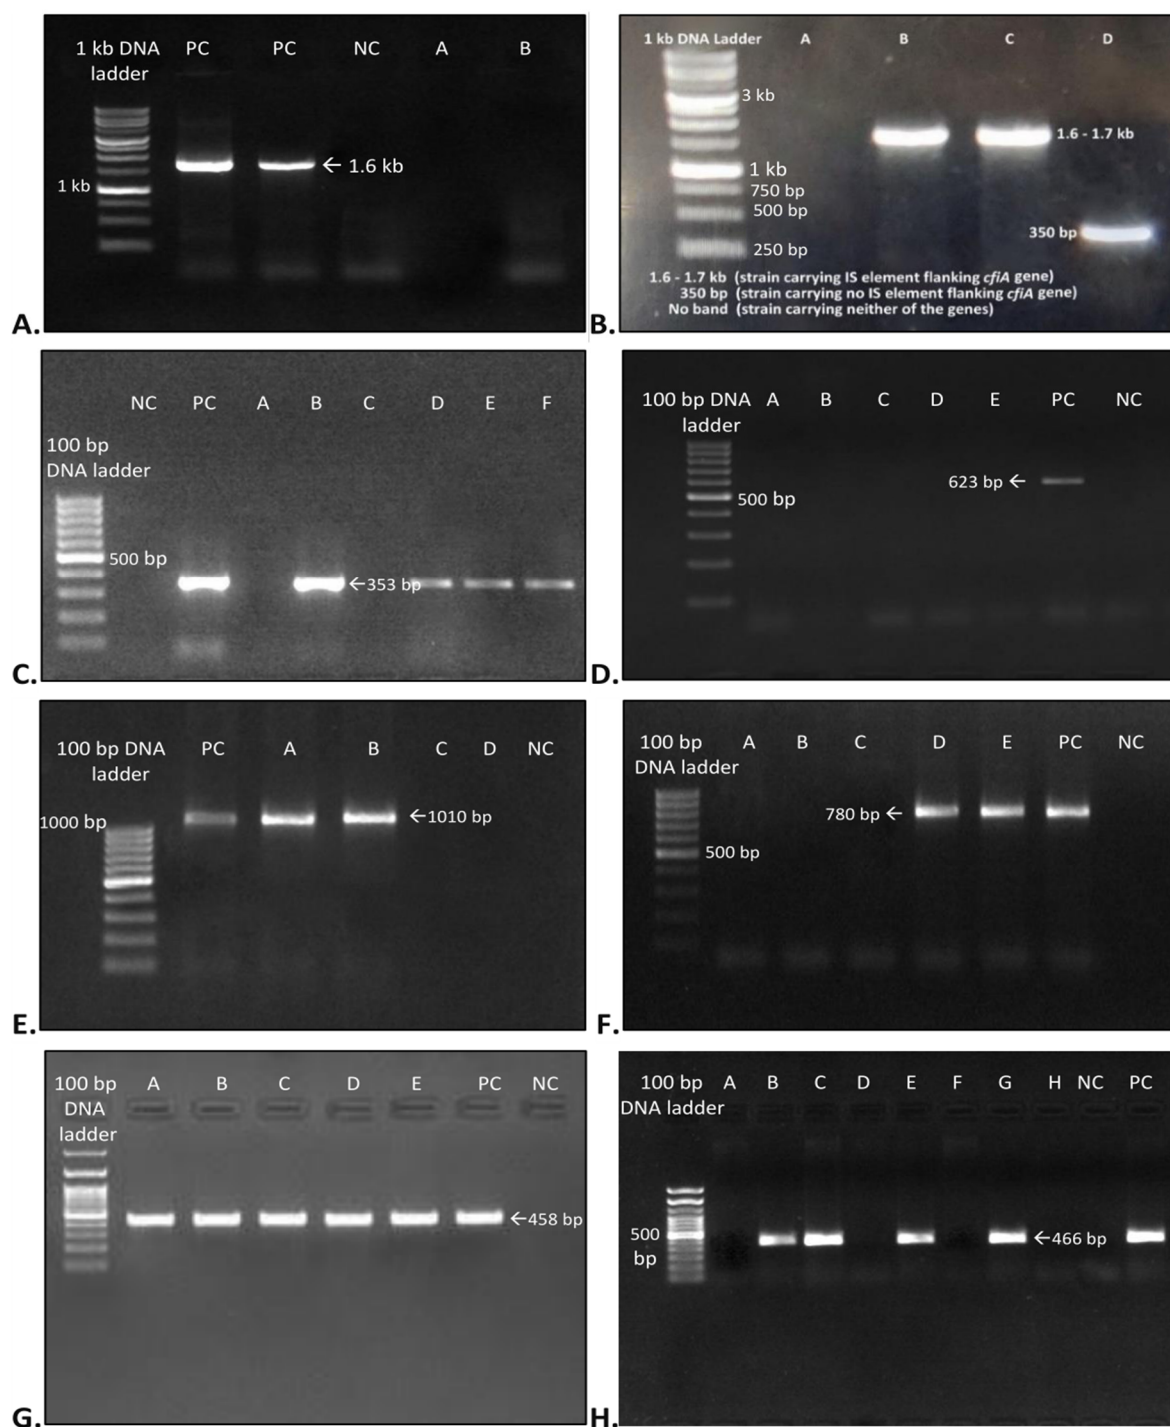

**Figure S3:** Agarose gel picture for PCR amplified product of A.) *IS1186* element B.) *cfiA* gene and the flanking IS elements C.) *cfiA* gene D.) *cat* gene E.) *cfxA* gene F.) *cepA* gene G.) *nim* gene H.) *ermF* gene. The first lane contains DNA ladder; PC, positive control; NC, negative control.
